# Supplementary material
Source: Research Square preprint supplement (doi:10.21203/rs.3.rs-9148628/v1)
Supplement: Supplementary file 2 [file 4fca7389103fac74a3d9f8dd.docx]

A study **T**o reduce financial **B**urden of tuberculosis by social **PROTEC**tion in **T**imor-Leste (**TB-PROTECT**)

: a cluster randomized trial

**Sponsored by:**

KOICA

**Principal Investigator:**

Hongjo Choi, MD, PhD

**Version Number:**

Version 3.1

**Day Month Year**

1 March, 2022

**Statement of Compliance**

The study will be carried out in accordance with Good Clinical Practice (GCP) as required by the following:

- *ICH GCP E6*
- *Completion of Human Subjects Protection Training*

**Signature Page**

The signature below constitutes the approval of this protocol and the attachments and provides the necessary assurances that this study will be conducted according to all stipulations of the protocol, including all statements regarding confidentiality, and according to local legal and regulatory requirements and applicable Republic of Korea and Timor-Leste regulations and ICH guidelines.

Timor-Lest Study Site Principal Investigator:

Signed:________________________________ Date:_____________________

Constantino Lepes,MPH

Overall Study Principal Investigator:

Signed:________________________________ Date:_____________________

Hee-Jin Kim, MD, MPH

**Table of Contents**

[Overview 5](#_Toc75876835)

[Background 6](#_Toc75876836)

[Background information 6](#_Toc75876837)

[Conceptual framework 8](#_Toc75876838)

[Objectives 10](#_Toc75876839)

[Methods and study design 11](#_Toc75876840)

[Overview 11](#_Toc75876841)

[Study setting and study population 11](#_Toc75876842)

[Recruitment 15](#_Toc75876843)

[Routine care and intervention strategy 16](#_Toc75876844)

[Study procedures 20](#_Toc75876845)

[Study outcomes 22](#_Toc75876846)

[Data management 24](#_Toc75876847)

[Statistical analysis 25](#_Toc75876848)

[Sample size and power considerations 26](#_Toc75876849)

[Ethical considerations 27](#_Toc75876850)

[Potential risks 27](#_Toc75876851)

[Protection of participants and data 28](#_Toc75876852)

[Potential benefits of the study 29](#_Toc75876853)

[Result dissemination and study governance 30](#_Toc75876854)

[Abbreviations 31](#_Toc75876855)

[Competing interests 32](#_Toc75876856)

[References 33](#_Toc75876857)

# **Overview**

| **Title** | A study To reduce financial burden of tuberculosis by social protection: a cluster randomized trial in Timor-Leste (TB-PROTECT) |
| --- | --- |
| **Target population** | All notified tuberculosis patients 17 years of age or older |
| **Study sites** | 32 community health centers in Timor-Leste |
| **Study design** | Cluster randomized implementation study  (Enrollment: 160 participants per arm) |
| **Study duration** | 2 years |
| **Primary objectives** | To reduce the proportion of household experienced catastrophic cost defined as spending more than 20% of household income due to tuberculosis diagnosis and treatment   - Intervention strategy   1. Conditional cash transfer: 30 USD a month during 6 months (condition is a regular taking of medicine)   2. Conduction patients cost survey - Routine care: routine community or facility-based care and management with patients cost survey |

# **Background**

## Background information

In 2006, World Health Organization (WHO) developed a new tuberculosis (TB) strategy called as “Stop TB Strategy” in 2006 along with Millennium Developmental Goals (World Health Organization, 2006). The strategy included three main indicators which were (1) to detect at least 70% of new sputum smear-positive TB cases and cure at 85% of these cases, (2) by 2015, reduce TB prevalence and death rates by 50% relative to 1990 and (3) by 2050, eliminate TB as a public health problem (<1 case per million population). The strategy had ambitious goals, but global TB society tried to achieve the targets.

To achieve sustainable developmental goals, WHO launched “End TB Strategy” in 2015 (World Health Organization, 2015). The new strategy`s vision aims to open a world free of tuberculosis means zero deaths, disease and suffering due to tuberculosis. Global TB society emphasized the End TB Strategy must be a paradigm shift , because the plan did not focus on clinical efforts, but also emphasize universal health coverage and social protection to reduce patient`s economic suffering due to TB care and management (Stop TB Partnership, 2015; Uplekar et al., 2015). As a specific target related to patients` suffering, the End TB Strategy aims to reduce the proportion of household facing catastrophic costs due to TB.

In Timor-Leste, total 4,240 and 3,295 new and previously treated TB patients were newly notified in 2019 and 2020, respectively. However, WHO estimates about 6,400 TB patients would be incident in a year that is equal to 498 cases per 100,000 people in 2019 (World Health Organization, 2020). In the light of high TB burden in Timor-Leste, financial suffering would be one of main challenges to meet the global targets. A qualitative study and mixed method study identified that low income level, low familial support and low resources to TB case were associated with treatment discontinuation of TB (Dos Reis, 2016; Price et al., 2016). Moreover, a well-structured study estimated the proportion of household suffering from catastrophic costs due to TB care and management, surveyed 457 patients and identified about 83% TB-affected household were suffering from catastrophic costs in Timor-Leste (Viney et al., 2019). A new meta-analysis study that was not peer-reviewed yet, reported about 43% of TB-affected household faced the catastrophic costs due to TB in the world (Ghazy et al., 2021). Compared with the new evidence, the status of financial burden of TB-affected household in Timor-Lest would be severed than other countries. The patients cost survey in Timor-Leste recommended an urgent action to mitigate the financial costs of TB patients (Viney et al., 2019)

## Conceptual framework

There is a vicious circle between poverty and TB (Figure 1). Conventionally, poverty was considered as a cause of TB, but recently more evidence was cumulated to explain the reverse causation from TB to poverty (Lönnroth et al., 2014). In particular, the reverse mechanism could be explained by income loss related to reduced productivity and time at work due to TB suffering, and more spending money for TB care (Ortblad et al., 2015). To hinder this causal mechanism, social protection was prioritized in TB program and policy (Carter et al., 2018). Cash transfer is a highly recommended program to tackle this vicious circle to prevent, increase adherence, and cure TB and originally designed to reduce poverty at the starting point in Figure 1 (Boccia et al., 2016). However, the coverage of population would be a critical challenges to implement unconditional or conditional cash transfer. Therefore, this study only focused on the TB patients rather than all population. The study implements a conditional cash transfer for TB patients to hinder the reverse mechanism from TB to poverty, which directly targets the grey boxes in Figure 1.

| Poverty as a causal determinants of tuberculosis  ↓ Poor living conditions  ↑ Malnutrition  ↑ Risk behavior  ↑ Co-infections  ↓ Wealth  ↓ Health  ↑ Contagious period  ↑ Susceptibility  ↑ Drug resistance  ↓ Education    ↓ Health system access  ↓ Productivity at work  ↓ Time at work  ↓ Money spent on treatment  ↑ Drug resistance  Tuberculosis as a causal determinants of poverty |
| --- |

Figure . Vicious circle between poverty and tuberculosis (source: Ortblad et. al, 2015)

# **Objectives**

*Primary objective*

Examine whether TB-specific cash transfer reduce the proportion of TB patients who experienced catastrophic cost due to TB.

*Secondary objectives*

- Identify whether TB-specific cash transfer reduce indirect cost due to TB.
- Identify whether TB-specific cash transfer reduce non-medical cost due to TB.
- Evaluate whether TB-specific cash transfer improve treatment adherence and increase treatment success rate of TB.
- Investigate whether the impact of TB-specific cash transfer on the proportion of TB patients who experienced catastrophic cost due to TB is modified by baseline socioeconomic position.
- Investigate the interaction between baseline socioeconomic position and TB-specific cash transfer on treatment success rate of TB.

# **Methods and study design**

## Overview

The study conducts a cluster randomized study to examine the impact of TB-specific financial support on reducing social suffering due to TB care and management. The effectiveness of the intervention will be assessed conducting patients cost survey from control and intervention areas during 11 months study period (5 months of patient enrollment + 6 months of follow-up).

## Study setting and study population

The target setting is health care facilities in Timor-Leste. The unit of randomization will be the TB treatment units (N=32). 32 health care facilities have reported TB patients and monitored quarterly. The range of number of annual notified TB patients among health care facilities are vary from 0 to 232 in 2018-2020 fiscal years. Each health care facility would be considered as a cluster. The coefficient of variance of cluster sizes was about 1.0 (means of cluster size: 25.69, standard deviation: 25.65). To assure the minimum number of enrollments in a month, we choose the least number of patients notification in each facility among 3 years. Conservatively, we assume the least number of enrollments in a month will be done. In table 1, (A) depicts the minimum annual number of TB cases in each community health center (CHC) during 3 years.

Table . The distribution of notified tuberculosis patients in all health care facilities in study region

| Municipalities | Community health center | DOT center | Number of notified TB patients (year) | | | | Minimum number among 3 years (A) |
| --- | --- | --- | --- | --- | --- | --- | --- |
| 2018 | 2019 | 2020 | |
| Baucau | Baquia | ? | 27 | 22 | 9 | | 9 |
| Bucoli |  | 20 | 19 | 11 | | 11 |
| Laga |  | 42 | 30 | 36 | | 30 |
| Osoqueli |  | 0 | 10 | 6 | | 6 |
| Quelicai |  | 42 | 26 | 16 | | 16 |
| Riamare |  | 132 | 109 | 58 | | 58 |
| Uailili |  | 58 | 45 | 36 | | 36 |
| Vemace |  | 24 | 13 | 11 | | 11 |
| Venilale |  | 47 | 28 | 34 | | 28 |
| Bobonaro | Atabae | ? | 25 | 32 | 23 | | 23 |
| Balibo |  | 29 | 39 | 69 | | 29 |
| Bobonaro |  | 36 | 54 | 49 | | 36 |
| Cailaco |  | 20 | 17 | 15 | | 15 |
| Kakania |  | - | - | - | | 0 |
| Lolotoe |  | 20 | 8 | 9 | | 8 |
| Maliana Vila |  | 147 | 122 | 102 | | 102 |
| Covalima | Fatululik |  | 1 | 10 | 4 | | 1 |
| Fatumea |  | 4 | 18 | 5 | | 4 |
| Fohorem |  | 5 | 21 | 12 | | 5 |
| Maucatar |  | 30 | 32 | 22 | | 22 |
| Suai Vila | √ | 82 | 123 | 122 | | 82 |
| Tiliomar |  | 7 | 36 | 9 | | 7 |
| Zumalai |  | 13 | 29 | 33 | | 13 |
| Dili | Atauro | √ | - | - | - | | 5[[1]](#footnote-1) |
| Metinaro |  | - | - | - | | 11[[2]](#footnote-2) |
| Ermera | Atsabe |  | 23 | 20 | 19 | | 19 |
| Ermera Vila |  | 30 | 65 | 30 | | 30 |
| Gleno | √ | 84 | 232 | 97 | | 84 |
| Guisarudu |  | 0 | 0 | 0 | | 0 |
| Hatulia |  | 52 | 53 | 54 | | 52 |
| Letefoho |  | 44 | 68 | 44 | | 44 |
| Railaco |  | 35 | 25 | 32 | | 25 |
| Sum of the minimum number (n, mean, standard deviation) | | | | | | (822, 25.69, 25.65) | |

## Eligibility criteria for the study

1. Inclusion criteria
   1. Initiating standard 6 months treatment regimen (2RHZE/4RH) for active tuberculosis at a study facility during the study period.
   2. 1 months or less from the initiation of TB treatment.
   3. 17 years old or more
2. Exclusion criteria
   1. Confirmed as drug-resistant TB
   2. Decided to start of switch to 2nd line drug regimen due to clinical reasons
   3. Prisoners

## Recruitment

*Health centers*

The study has been conceptualized to support almost half of all regions in Timor-Lest. The funding agency, Korea International Cooperation Agency (KOICA) has designated 5 municipalities as a project coverage. The name of original project is “Capacity building on community-bases tuberculosis diagnosis and management in Timor-Leste”. The study will be conducted a part of this original project. To design the current study, we reviewed TB surveillance data of the 5 municipalities from 2018 to 2020 in Timor-Leste. 5 municipalities include Baucau, Bobonaro, Covalima, Ermera and Dili. Dili is the capital city of Timor-Lest and notified a largest number of TB patients in a year. Therefore, we reviewed the registered number of TB patients in each health care facility in Dili, where includes Atauro and Metinaro. All health centers located in those regions will participate the study and participants will be recruited from those during the study period.

*Participants recruitment*

This is a pragmatic study to evaluate the reduction of the burden from catastrophic costs due to TB by social protection approach. During the study period except for the transition period, people who visit the study sites and initiate TB treatment will be screened according to the eligibility stated above. Once a patient meets the criteria, a researcher explains the study and try to obtain the informed consent. All study procedure will be performed after obtaining the informed consent. According to the randomization stated below, a patient recruited during the period of routine care will be allocated as a control group and a patient recruited during the period of intervention will be allocated as an intervention group.

## Routine care and intervention strategy

**Routine care** (Ministry of Health, 2020)

*TB diagnosis*

Options for the initial screening include screening for symptoms (screening either for cough lasting for longer than 2 weeks, or screening for any symptom compatible with TB, including cough of any duration, hemoptysis, weight loss, fever or night sweats) or screening with chest radiography. If symptom screening is used initially, then chest radiography can be used as a second screen to improve the pre-test probability of the subsequent diagnostic test, and to reduce the number of people who need to undergo further diagnostic evaluation. Starting in 2014, the National Tuberculosis Program (NTP) has implemented the Xpert MTB/RIF assay as an additional test for diagnosis of non-resistant and resistant forms of TB. The assay is simple to use and provides results directly from sputum in less than 2 hours. Xpert is currently available at 8 locations throughout the country, and further expansion will be planned according to funding availability. Smear-microscopy as the initial diagnostic test will gradually be phased out.

*Case management for cases without confirmed drug resistance (DS-TB)*

The objective of chemotherapy is to achieve a cure rate of at least 90% of all newly detected

bacteriologically confirmed TB cases. The treatment regimens will cure all such cases if the requirements for chemotherapy are followed and unless the patient is in a critical condition, coming too late for treatment, or the bacilli are resistant to both isoniazid and rifampicin (multidrug-resistant TB). The main requirements for adequate chemotherapy are:

1. An appropriate combination of quality assured anti-tuberculosis drugs (which would ensure cure)

2. Prescription in the correct dosage

3. All doses to be taken regularly by the patient

4. Prescribed for period of time (to prevent relapse)

Directly observed therapy (DOT) is a crucial component of the DOTS strategy. All regimens that contain Rifampicin should be taken by the patient under direct observation. Currently the WHO defines DOT as any person observing the patient taking medications in real time. The treatment observer does not need to be a health-care worker, but could be a friend, a relative or a lay person who works as a treatment supervisor or supporter. Community-based or home-based DOT has more advantages than health facility-based DOT while family members should not be the first or only option for administering DOT. DOT is better provided at home or in the community and by trained lay providers or health-care workers. There may be challenges in providing community- or home-based DOT by health-care workers because of the increased number of healthcare workers required and the increased costs for staff time and daily travel to the community or patient’s home. DOT provision in the community or at home by trained local lay persons is more feasible. A combination of lay provider and health-care worker for provision of community- or home-based DOT is also an option.

NTP guideline (2020) stated about a couple of material support for the drug-susceptible tuberculosis (DS-TB) patient, but currently the financial incentive is actively providing for drug-resistant tuberculosis (DR-TB) patients only.

**Intervention**

The TB-PROTECT study aims to reduce the proportion of household who suffered from catastrophic cost due to TB in the population perspective, and the financial burden of non-medical cost and indirect-costs due to TB care and management in the patient`s perspective. Therefore, two components are main activities including total 180 USD cash transfer liked to adherence check for intervention group only and patient cost surveys for both intervention and control group.

*Cash transfer*

All enrolled TB patients in the intervention group will be provided 30 USD cash a month during 6 months standard treatment period. There is only a condition that is a regular check of drug administration. DOT will be followed to NTP guidelines stated above in routine care. Patient incentive will be provided if DOT complies with 80% or more. Health care workers will monitor the treatment adherence to NTP guidelines and appropriate documents to monitor the adherence will be copied and provided to the study teams.

*Patient costing survey*

World Health Organization developed the guideline for the tuberculosis patient cost surveys and disseminated a standardized questionnaires[[3]](#footnote-3) for the surveys (World Health Organization, 2017). We also use the standardized questionnaires with a few modifications such as excluding multidrug-resistant tuberculosis (MDR-TB) related questions, because MDR-TB is not eligible for the study.

Randomization

32 clusters will be randomly assigned into an intervention or control arm in a randomly assigned order. The randomization will be disclosed to all health care facilities directors (or appropriate representative) at a meeting chaired by the Timor-Leste NTP manage (Figure 2).

|  |  | Number of clusters (n=32) | |  |  |
| --- | --- | --- | --- | --- | --- |
|  |  |  |  |
|  |  |  |  |  |  |
|  |  |  |  |  |  |
|  |  | Randomization (1:1 ratio) | |  |  |
|  |  |  |  |
|  |  |  |  |  |  |
|  |  |  |  |  |  |
|  |  |  |  |  |  |
| Intervention group (n=16) | |  |  | Control group (n=16) | |
|  |  |
|  |  |  |  |  |  |
| Participant Recruitment  and Cost Survey | |  |  | Participant Recruitment  and Cost survey | |
|  |  |
|  |  |  |  |  |  |
| Cash-transfer intervention | |  |  | Management as usual | |
|  |  |
|  |  |  |  |  |  |
| Cost survey | |  |  | Cost Survey | |
|  |  |
|  |  |  |  |  |  |
|  |  |  |  |  |  |
| Collect the outcome (at the end of therapy: 6 months) | | | | | |
|  |

Figure . Study flow

## Study procedures

*Training for health care workers*

The TB responsible at community health centers will be invited for the project training course. The project training course consists of introduction of the protocol, ethical education for human research, the review of informed consent, and how to conduct patient cost surveys. The training course will be held once, in Dili with all relevant personnel invited. The training for the study will be conducted at least a month before the transition period of the first cluster. If the community health centres also utilize the aid of volunteer health workers for DOT, the respective health workers may also be invited for training – pending further discussions.

*Patient cost surveys*

WHO released the generic survey instrument which electronic version is also available on <https://enketo.ona.io/x/Y5T9>. The questionnaire consists of patient information, costs before the current TB treatment and cost during current TB treatment. During the training course, the instruction to fill the questionnaire will be educated. If the voluntary health workers are involved in the conducting of the survey, they will be provided with daily stipend including costs for food and transportation. A dedicated staff will be trained to coordinate the survey progress at the central level. Survey participants in the control group will receive monetary compensation.

*Data collection*

The study mainly collects data of the patient cost survey to meet the primary objective and secondary objectives. Additionally, the study team will collect the final treatment outcome that is routinely collected by NTP, provided by the Municipalities Health Services’ TB Coordinators. The data will be collected (monthly/quarterly/yearly). The collected raw data will be sent to Dr. Hongjo Choi immediately, who will ensure the screening of confidential information listed in the data. Method is as follows: The study allocates unique study ID to all study population. There is an identification log to match personal information with the study ID, which will be managed by two study staffs designated by the principal investigator. Other staffs are unable to access the identification log and only aware of the study ID. All collected data will be labeled with study ID and stored appropriately. Once received, Dr. Choi will extract necessary data from the treatment outcomes to conduct the analysis of primary and secondary outcomes. Detailed data management and analysis methods are described in the following sections.

|  | Study period | | | |
| --- | --- | --- | --- | --- |
|  | Enrollment | Allocation | Post-allocation | Close-out |
|  | 0-5 months | | 6 months | 2 months |
| TIMEPOINT | JAN-MAY, 2023 | | JUN-NOV, 2023 | NOV-DEC, 2023 |
| ENROLLMENT: |  |  |  |  |
| Eligibility screen |  |  |  |  |
| Informed consent |  |  |  |  |
| Allocation |  |  |  |  |
| INTERVENTIONS: |  |  |  |  |
| Intervention |  |  | O |  |
| Management as usual |  |  | O |  |
| ASSESSMENTS: |  |  |  |  |
| Cost survey |  |  | O |  |
| Treatment outcome |  |  | O |  |

**Figure 3. Study timeline (SPIRIT diagram)**

## Study outcomes

*Definitions*

| • | Catastrophic cost: | Medical and non-medical out-of-pocket payments and indirect costs exceeding a threshold (20%) of the household`s income. |
| --- | --- | --- |
| • | Medical cost: | Out of pocket payments for TB diagnosis and treatment made by TB patients. |
| • | Non-medical cost: | Out of pocket payments related to the use of TB health services such as payments for transportation, accommodation, or food. |
| • | Indirect cost: | Patient or guardian lost time, lost wages (net of welfare payments) and lost income due to TB health care seeking and hospitalization during TB care |
| • | Cure: | A pulmonary TB patient with bacteriologically confirmed TB at the beginning of treatment who was smear- or culture-negative in the last month of treatment and on at least one previous occasion. |
| • | Treatment completed: | A TB patient who completed treatment without evidence of failure BUT with no record to show that sputum smear or culture results in the last month of treatment and on at least one previous occasion were negative, either because tests were not done or because results are unavailable |
| • | Treatment failed: | A TB patient whose sputum smear or culture is positive at month 5 or later during treatment. |
| • | Died: | A TB patient who dies for any reason before starting or during the course of treatment. |
| • | Lost to follow-up: | A TB patient who did not start treatment or whose treatment was interrupted for 2 consecutive months or more |
| • | Not evaluated: | A TB patient for whom no treatment outcome is assigned. This includes cases “transferred out” to another treatment unit as well as cases for whom the treatment outcome is unknown to the reporting unit. |
| • | Treatment success: | The sum of cured and treatment completed |

*Primary outcome*

- The proportion of TB patients who suffered from catastrophic cost due to TB

*Secondary outcomes*

- Mean indirect cost due to TB in each group =
- Mean non-medical cost in each group =
- Treatment success rate in each group =

## Data management

Dr. Hongjo Choi (epidemiologist) will oversee data management. All data will be entered in pre-fixed excel file with validation of data using range and consistency checks. Quality control procedures will include review of all study data from the excel file. The study staffs other than data entry staffs will review accuracy and discrepancy between source document (paper questionnaires) and entered data in the excel file, which process would be called as reconciliation. Once reconciliation is completed, the excel sheet will be locked. Dr. Choi will review a random sample of the excel file and source document for quality assurance at 2 or 3 times a year

## Statistical analysis

Primary and secondary outcomes were analyzed according to intention-to-treat (ITT) and per-protocol (PP) principles. The ITT analysis will include all enrolled participants. The PP analysis will exclude (1) participants who enrolled in the intervention group, but not received the cash transfer or withdraw before providing the first cash transfer, and (2) participants who enrolled in the intervention group and received at least one cash transfer, but discontinued to be provided cash transfer due to transferred out to the control group.

The descriptive analysis will report the numbers, proportion, means/median and standard deviation or interquartile range of participants demographic and clinical characteristics, and income and costs.

The mixed effect modelling methods will be used to examine the effect of the cash transfer on the financial suffering, incorporating fixed (intervention and time) and random (cluster) factors. The primary outcome definitions will be recorded as binary (patient suffered from catastrophic cost = 1; patient not suffered from catastrophic cost = 0), with the proportion of patients suffered from catastrophic cost anticipated to decrease with the intervention. Risk difference and relative risk will be reported along with 95% confidence intervals.

## Sample size and power considerations

The study aims to identify the impact of TB-specific cash transfer on reducing social suffering due to TB. The sample size calculation uses formulae appropriate for a cluster randomized controlled trial (Hemming & Marsh, 2013). The primary outcome is the proportion of household who experienced catastrophic cost due to TB. A type 1 error of 5% and power of at least 80% is assumed. A recent study conducted in Indonesia reported that the proportion of household who experienced catastrophic cost due to TB would be decreased to 25% for DS-TB cases (Fuady et al., 2019). The study simulated various scenario with difference range of TB-specific cash transfer and estimated 25% reduction of the proportion when transportation, food and income loss were fully covered by cash transfer. If the amount of cash transfer covers food an income loss, the reduction rate was decreased to 20%. There were no previous studies how much the cash transfer could protect the social suffering in Timor-leste. Therefore, we assumed that the TB specific cash transfer could reduce the proportion of household who experienced catastrophic cost due to TB up to 20% according to the second-best results from Indonesian study (assumptions: intra cluster correlation=0.05). The coefficient of variation of the cluster sizes was about 1.0 and randomized all clusters to intervention and control arm with 1:1 ratio (Table 1). With these assumptions, the sample size calculation was done by using *clustersampsi* command in Stata 15.1).

The 16 clusters will be randomized to each arm with 9 average cluster sizes. Drop-out rate from the study assumed 10%. Therefore, 160 patients should be randomized in each arm. According to the surveillance data, all enrollments would be completed during 5 months, because the mean of monthly notified TB patients in each cluster was 2.1 persons.

# **Ethical considerations**

## Potential risks

There are minimal risks to participants in this study. The primary risk to patients treated for TB during the study period is the potential for loss of confidentiality and stigma should their personal health information, including HIV or TB status, be disclosed. Of note, patients enrolled on the intervention group will have a greater level of treatment monitoring that is afforded in routine care due to the condition that is taking a medicine for the cash provision. Participants who are health care providers may be at minimal risk for inconvenience due to time for participation and possible repercussions of answering sensitive questions about their work and workplace. Furthermore, health system provider participants for data collection may feel that they are being individually evaluated for the work they perform for data collection.

## Protection of participants and data

The study will be submitted for approval to the Institutional Review Board of the Korean National Tuberculosis Association (KNTA) and Ministry of Health in Timor-Leste, Institute Nasional Saude (INS). All study staff will be required to have completed Human Subjects Research Training.

During the implementation period at each health facility, the decision to use routine vs. TB-specific cash transfer will be made by patients and their providers. To minimize the potential for loss of confidentiality, all study data will be stored in locked or password-protected cabinets or databases accessible only to study personnel. Patient names will be used to match patient records across data sources but will not be included in the password-protected, electronic study database.

We will obtain written consent from patients participating in the interviews. A member of the research team will read the informed consent script to each participant and answer any questions. They will emphasize that participation is voluntary, that consent can be withdrawn at any time, and that a participant can refuse to answer any specific question. After obtaining the written consent from the patient, all study procedure will be started.

Study data will be entered into a database, which is hosted on a secure server at KNTA. All study staff will have a unique username and password. No patient identifiers will be exported as part of analysis datasets.

## Potential benefits of the study

Patients treated during the implementation period may benefit from greater convenience and reduced cost. They may also benefit from enhanced monitoring of treatment adherence and follow-up if non-adherent to medications relative to what is done in routine care.

Potential benefits to society include identification of strategies to improve TB treatment completion and thereby reduce transmission and amplification of drug resistance. If successful, the proposed strategy could potentially be scaled up to improve TB care in similar settings.

## Result dissemination and study governance

The study results will be communicated to stakeholders through dissemination meetings and to participating health centers using language-appropriate information sheets. Investigators will present results at relevant conferences and submit manuscript(s) to peer-reviewed journals. Public access to the participant-level dataset of main study results and statistical code will be made available.

Because of the low-risk nature of the research, the Principal Investigator will be responsible for monitoring the data, assuring protocol compliance, and conducting safety reviews on a quarterly basis. The Principal Investigator will submit regular progress reports, including recommendations on whether the project should continue unchanged, require modification/amendment, or close to enrollment. All major modifications (e.g., study design, sample size, study termination or suspension) will be approved by the ethics committees.

# **Abbreviations**

| WHO | World Health Organization |
| --- | --- |
| TB | Tuberculosis |
| KOICA | Korea International Cooperation Agency |
| NTP | National Tuberculosis Program |
| DOT | Directly Observed Therapy |
| DS-TB | Drug-susceptible tuberculosis |
| DR-TB | Drug-resistant tuberculosis |
| MDR-TB | Multidrug-resistant tuberculosis |
| ITT | Intention-to-treat |
| PP | Per-protocol |
| HIV | Human immunodeficiency virus |
| KNTA | Korean National Tuberculosis Association |
|  |  |
|  |  |
|  |  |
|  |  |
|  |  |
|  |  |
|  |  |
|  |  |

# **Competing interests**

The investigators declare that they have no competing interests.

# **References**

Boccia, D., Pedrazzoli, D., Wingfield, T., Jaramillo, E., Lönnroth, K., Lewis, J., Hargreaves, J., & Evans, C. A. (2016). Towards cash transfer interventions for tuberculosis prevention, care and control: key operational challenges and research priorities. *BMC infectious diseases*, *16*(1), 307. <https://doi.org/10.1186/s12879-016-1529-8>

Carter, D. J., Glaziou, P., Lonnroth, K., Siroka, A., Floyd, K., Weil, D., Raviglione, M., Houben, R., & Boccia, D. (2018). The impact of social protection and poverty elimination on global tuberculosis incidence: a statistical modelling analysis of Sustainable Development Goal 1. *Lancet Global Health*, *6*(5), e514-e522. <https://doi.org/10.1016/s2214-109x(18)30195-5>

Dos Reis, J. (2016). *Factors associated with medication adherence among tuberculosis patients in Timor-Leste* Queensland University of Technology].

Fuady, A., Houweling, T. A., Mansyur, M., Burhan, E., & Richardus, J. H. (2019). Effect of financial support on reducing the incidence of catastrophic costs among tuberculosis-affected households in Indonesia: eight simulated scenarios. *Infectious Diseases of Poverty*, *8*(1), 1-14.

Ghazy, R. M., Saeh, H. M. E., Abdulaziz, S., Hammouda, E. A., Elzorkany, A., Kheder, H., Zarif, N., Elrewany, E., & ElHafeez, S. A. (2021). A Systematic Review and Meta-Analysis on Catastrophic Cost incurred by Tuberculosis Patients and their Households. *medRxiv*, 2021.2002.2027.21252453. <https://doi.org/10.1101/2021.02.27.21252453>

Hemming, K., & Marsh, J. (2013). A menu-driven facility for sample-size calculations in cluster randomized controlled trials. *The Stata Journal*, *13*(1), 114-135.

Lönnroth, K., Glaziou, P., Weil, D., Floyd, K., Uplekar, M., & Raviglione, M. (2014). Beyond UHC: Monitoring Health and Social Protection Coverage in the Context of Tuberculosis Care and Prevention. *PLOS Medicine*, *11*(9), e1001693. <https://doi.org/10.1371/journal.pmed.1001693>

Ministry of Health. (2020). Comprehensive TB Guidelines for National Tuberculosis Control Program. *Ministry of Health, Democratic Republic of Timor-Leste*.

Ortblad, K. F., Salomon, J. A., Bärnighausen, T., & Atun, R. J. T. L. (2015). Stopping tuberculosis: a biosocial model for sustainable development. *386*(10010), 2354-2362.

Price, J. A., Soares, A. I. S., Asante, A. D., Martins, J. S., Williams, K., & Wiseman, V. L. (2016). “I go I die, I stay I die, better to stay and die in my house”: understanding the barriers to accessing health care in Timor-Leste. *BMC Health Services Research*, *16*(1), 535. <https://www.ncbi.nlm.nih.gov/pmc/articles/PMC5045628/pdf/12913_2016_Article_1762.pdf>

Stop TB Partnership. (2015). The Paradigm Shift, 2016-2020 - Global Plan to End TB. In. Geneva: Stop TB Partnership.

Uplekar, M., Weil, D., Lonnroth, K., Jaramillo, E., Lienhardt, C., Dias, H. M., Falzon, D., Floyd, K., Gargioni, G., & Getahun, H. (2015). WHO's new End TB Strategy. *The Lancet*, *385*(9979), 1799-1801.

Viney, K., Amaral, S., Marques, E. B., Siroka, A., Lopes, C., & Nery, S. V. (2019). Four of five tuberculosis patients experience catastrophic costs related to TB diagnosis and care in Timor-Leste. *The International Journal of Tuberculosis and Lung Disease*, *23*(11), 1191-1197. <http://docserver.ingentaconnect.com/deliver/connect/iuatld/10273719/v23n11/s10.pdf?expires=1609829621&id=0000&titleid=3764&checksum=2FF71D434FA3DF85398B0EB5DDC437B1>

World Health Organization. (2006). The Stop TB Strategy: Building on and enhancing DOTS to meet the TB-related Millenium Development Goals. In. Geneva: WHO/HTM/TB.

World Health Organization. (2015). Implementing the end TB strategy: the essentials. *World Health Organization*.

World Health Organization. (2017). Tuberculosis patient cost surveys: a handbook.

World Health Organization. (2020). Global Tuberculosis Report 2020. In. Geneva: WHO/HTM/TB.

1. We used other data sources from cohort review and assumed that at least 5 patients will be notified in the community health center [↑](#footnote-ref-1)
2. Becorra community health center collected all notified TB cases from Metinaro community health center. We assumed that the real notification number in Metinaro would be 10% of Becorra. [↑](#footnote-ref-2)
3. https://enketo.ona.io/x/Y5T9 [↑](#footnote-ref-3)
