# Supplementary material
Source: Research Square preprint supplement (doi:10.21203/rs.3.rs-9148628/v1)
Supplement: Supplementary file 3 [file a71d3bb335cae0b7861dc636.docx]

Table S 1. Baseline personal and household monthly income by diagnosis and treatment period, Timor-Leste, 2022–2023.

| **Period** | **Total**  **(n = 329)** | | **Control**  **(n = 168)** | | **Intervention**  **(n = 161)** | | **p-value** |
| --- | --- | --- | --- | --- | --- | --- | --- |
| **Mean (SD)** | **Median (IQR)** | **Mean (SD)** | **Median (IQR)** | **Mean (SD)** | **Median (IQR)** |
| **Pre-diagnosis** |  |  |  |  |  |  |  |
| Personal income | 39.37 (91.97) | 0.00 (0.00-30.00) | 37.12 (97.67) | 0.00 (0.00-30.75) | 41.71 (85.86) | 0.00 (0.00-30.00) | 0.65 |
| Household income | 74.75 (126.84) | 30.00 (0.00-100.00) | 62.48 (121.68) | 5.00 (0.00-62.50) | 87.55 (131.16) | 30.00 (0.00-125.00) | 0.07 |
|  |  |  |  |  |  |  |  |
| **At diagnosis** |  |  |  |  |  |  |  |
| Household income | 62.36 (150.07) | 7.00 (0.00-50.00) | 52.12 (171.48) | 1.00 (0.00-40.25) | 73.04 (123.49) | 30.00 (0.00-115.00) | 0.2 |
|  |  |  |  |  |  |  |  |
| **Post-diagnosis** |  |  |  |  |  |  |  |
| Personal income | 23.47 (70.28) | 0.00 (0.00-0.00) | 16.37 (53.69) | 0.00 (0.00-0.00) | 30.88 (83.71) | 0.00 (0.00-0.00) | 0.06 |
| Household income | 66.74 (149.97) | 20.00 (0.00-75.00) | 57.48 (173.29) | 1.00 (0.00-50.00) | 76.40 (120.74) | 30.00 (0.00-115.00) | 0.25 |

IQR: interquartile range; n: number of participants; SD: standard deviation.

Note: All income values are expressed in United States dollars.

Table S 2. Mean, median, and proportion of tuberculosis-related costs per patient by gender and cost category, Timor-Leste, 2022–2023.

| **Cost category** | | | **Men** | | | | | **Women** | | | | | |
| --- | --- | --- | --- | --- | --- | --- | --- | --- | --- | --- | --- | --- | --- |
| **Mean** | **SD** | **%** | **Median** | **IQR** | **Mean** | **SD** | **%** | **Median** | **IQR** |
| **Pre-diagnosis** | (A) | Medical | 0.44 | 5.09 | 0.07 | 0.00 | 0.00, 0.00 | 3.85 | 25.17 | 0.68 | 0.00 | 0.00, 0.00 |
| (B) | Travel | 4.04 | 5.49 | 0.66 | 2.00 | 1.00, 4.00 | 3.24 | 3.53 | 0.57 | 2.00 | 1.00, 4.00 |
| (C) | Accommodation | 0.27 | 1.14 | 0.04 | 0.00 | 0.00, 0.00 | 0.46 | 1.98 | 0.08 | 0.00 | 0.00, 0.00 |
| (D) | Food | 1.99 | 4.23 | 0.32 | 1.00 | 0.00, 2.00 | 3.06 | 13.20 | 0.54 | 1.00 | 0.50, 1.50 |
| (E) | Nutrition | 1.18 | 4.58 | 0.19 | 0.00 | 0.00, 0.00 | 1.16 | 2.25 | 0.20 | 0.00 | 0.00, 1.00 |
| **Post-diagnosis** | (F) | Medical | 0.22 | 1.94 | 0.04 | 0.00 | 0.00, 0.00 | 0.13 | 1.51 | 0.02 | 0.00 | 0.00, 0.00 |
| (G) | Travel | 114.53 | 118.16 | 18.61 | 148.00 | 24.00, 168.00 | 130.21 | 110.45 | 23.01 | 168.00 | 36.00, 168.00 |
| (H) | Accommodation | 37.19 | 116.97 | 6.04 | 0.00 | 0.00, 0.00 | 32.15 | 89.19 | 5.68 | 0.00 | 0.00, 1.00 |
| (I) | Food | 337.08 | 399.27 | 54.76 | 182.00 | 168.00, 396.00 | 308.04 | 292.53 | 54.43 | 218.00 | 168.00, 354.00 |
| (J) | Nutrition | 78.00 | 202.09 | 12.67 | 0.00 | 0.00, 17.50 | 81.94 | 166.31 | 14.48 | 0.00 | 0.00, 137.00 |
| (K) | Household income loss | 40.58 | 378.89 | 6.59 | 0.00 | -180.00, 0.00 | 1.68 | 543.50 | 0.30 | 0.00 | -180.00, 0.00 |
| (L) | Hours lost x wage | -65.21 | 172.76 |  | 0.00 | -180.00, 0.00 | -84.14 | 89.65 |  | 0.00 | -180.00, 0.00 |
| **Medical** | (A+F) | | 0.66 | 5.43 |  | 0.00 | 0.00, 0.00 | 3.99 | 25.20 |  | 0.00 | 0.00, 0.00 |
| **Non-medical** | (B+C+D+E+G+H+I+J) | | 574.27 | 648.20 |  | 356.05 | 253.88, 669.38 | 560.25 | 474.22 |  | 435.00 | 337.00, 609.00 |
| **Indirect** | (K) | Output approach | 40.58 | 378.89 |  | 0.00 | -180.00, 0.00 | 1.68 | 543.50 |  | 0.00 | -180.00, 0.00 |
| (L) | Human capital approach | -65.21 | 172.76 |  | 0.00 | -180.00, 0.00 | -84.14 | 89.65 |  | 0.00 | -180.00, 0.00 |
|  |  |  |  |  |  |  |  |  |  |  |  |  |
| **Total** | | Output approach | 615.52 | 755.27 |  | 405.00 | 162.00, 761.00 | 565.92 | 693.16 |  | 397.00 | 262.00, 629.45 |
| Human  capital approach | 509.72 | 692.00 |  | 346.00 | 157.00, 609.50 | 480.10 | 489.86 |  | 359.50 | 169.50, 576.50 |

IQR: interquartile range; SD: standard deviation.

Note: All costs are expressed in United States dollars. Negative values in indirect cost categories (e.g., household income loss) represent a net financial gain due to the cash transfer intervention.

Table S 3. Mean, median, and proportion of tuberculosis-related costs per patient by treatment institution and cost category, Timor-Leste, 2022–2023.

| **Cost category** | | | **Health center** | | | | | **Public hospital** | | | | | **Others** | | | | |
| --- | --- | --- | --- | --- | --- | --- | --- | --- | --- | --- | --- | --- | --- | --- | --- | --- | --- |
| **Mean** | **SD** | **%** | **Median** | **IQR** | **Mean** | **SD** | **%** | **Median** | **IQR** | **Mean** | **SD** | **%** | **Median** | **IQR** |
| **Pre-diagnosis** | (A) | Medical | 0.42 | 6.21 | 0.07 | 0.00 | 0.00, 0.00 | 1.64 | 10.30 | 0.28 | 0.00 | 0.00, 0.00 | 18.79 | 56.58 | 3.58 | 0.00 | 0.00, 0.00 |
| (B) | Travel | 3.36 | 4.18 | 0.56 | 2.00 | 1.00, 4.00 | 6.34 | 7.24 | 1.06 | 4.00 | 2.00, 8.00 | 2.29 | 2.75 | 0.44 | 1.50 | 0.50, 2.00 |
| (C) | Accommodation | 0.26 | 0.96 | 0.04 | 0.00 | 0.00, 0.00 | 0.94 | 3.42 | 0.16 | 0.00 | 0.00, 0.00 | 0.21 | 1.02 | 0.04 | 0.00 | 0.00, 0.00 |
| (D) | Food | 2.06 | 9.83 | 0.34 | 1.00 | 0.00, 1.00 | 5.38 | 7.74 | 0.90 | 2.00 | 1.00, 6.00 | 1.28 | 1.23 | 0.24 | 1.00 | 0.50, 2.00 |
| (E) | Nutrition | 1.32 | 3.97 | 0.22 | 0.00 | 0.00, 0.00 | 0.18 | 0.86 | 0.03 | 0.00 | 0.00, 0.00 | 1.38 | 4.32 | 0.26 | 0.00 | 0.00, 0.00 |
| **Post-diagnosis** | (F) | Medical | 0.17 | 1.68 | 0.03 | 0.00 | 0.00, 0.00 | 0.38 | 2.53 | 0.06 | 0.00 | 0.00, 0.00 | 0.00 | 0.00 | 0.00 | 0.00 | 0.00, 0.00 |
| (G) | Travel | 139.78 | 118.30 | 23.30 | 168.00 | 48.00, 168.00 | 36.51 | 54.55 | 6.13 | 13.00 | 6.00, 25.00 | 80.72 | 74.48 | 15.37 | 48.00 | 12.00, 168.00 |
| (H) | Accommodation | 43.74 | 117.13 | 7.29 | 0.00 | 0.00, 16.00 | 2.67 | 17.89 | 0.45 | 0.00 | 0.00, 0.00 | 0.94 | 4.59 | 0.18 | 0.00 | 0.00, 0.00 |
| (I) | Food | 346.20 | 383.13 | 57.71 | 216.00 | 168.00, 366.00 | 246.64 | 218.36 | 41.39 | 168.00 | 129.00, 288.00 | 234.75 | 209.18 | 44.68 | 168.00 | 82.50, 354.00 |
| (J) | Nutrition | 97.08 | 204.28 | 16.18 | 0.00 | 0.00, 129.00 | 5.89 | 24.56 | 0.99 | 0.00 | 0.00, 0.00 | 30.00 | 107.62 | 5.71 | 0.00 | 0.00, 0.00 |
| (K) | Household income loss | -34.43 | 265.76 | -5.74 | 0.00 | -180.00, 0.00 | 289.33 | 965.18 | 48.55 | 0.00 | -180.00, 360.00 | 155.00 | 460.48 | 29.50 | 0.00 | -144.00, 300.00 |
| (L) | Hours lost x wage | -71.53 | 148.46 |  | 0.00 | -180.00, 0.00 | -100.30 | 90.14 |  | -180.00 | -180.00, 0.00 | -43.75 | 157.50 |  | 0.00 | -180.00, 0.00 |
| **Medical** | (A+F) | | 0.58 | 6.43 |  | 0.00 | 0.00, 0.00 | 2.02 | 10.54 |  | 0.00 | 0.00, 0.00 | 18.79 | 56.58 |  | 0.00 | 0.00, 0.00 |
| **Non-medical** | (B+C+D+E+G+H+I+J) | | 633.80 | 620.97 |  | 458.00 | 338.00, 713.00 | 304.55 | 239.43 |  | 267.00 | 155.00, 382.00 | 351.56 | 288.48 |  | 308.00 | 128.25, 516.00 |
| **Indirect** | (K) | Output approach | -34.43 | 265.76 |  | 0.00 | -180.00, 0.00 | 289.33 | 965.18 |  | 0.00 | -180.00, 360.00 | 155.00 | 460.48 |  | 0.00 | -144.00, 300.00 |
| (L) | Human capital approach | -71.53 | 148.46 |  | 0.00 | -180.00, 0.00 | -100.30 | 90.14 |  | -180.00 | -180.00, 0.00 | -43.75 | 157.50 |  | 0.00 | -180.00, 0.00 |
|  |  |  |  |  |  |  |  |  |  |  |  |  |  |  |  |  |  |
| **Total** | | Output approach | 599.95 | 697.05 |  | 397.75 | 176.75, 685.25 | 595.91 | 986.43 |  | 342.00 | 160.00, 648.00 | 525.35 | 474.51 |  | 501.25 | 157.75, 845.50 |
| Human  capital approach | 562.85 | 653.89 |  | 384.50 | 165.50, 638.05 | 206.28 | 269.72 |  | 162.00 | 7.00, 342.00 | 326.60 | 371.13 |  | 237.13 | 42.20, 532.00 |

IQR: interquartile range; SD: standard deviation.

Note: All costs are expressed in United States dollars. Negative values in indirect cost categories (e.g., household income loss) represent a net financial gain due to the cash transfer intervention.

Table S 4. Mean, median, and proportion of tuberculosis-related costs per patient by wealth index and cost category, Timor-Leste, 2022–2023.

| **Cost category** | | | **Lowest** | | | | | **Lower middle** | | | | | **Upper middle** | | | | | **Highest** | | | | |
| --- | --- | --- | --- | --- | --- | --- | --- | --- | --- | --- | --- | --- | --- | --- | --- | --- | --- | --- | --- | --- | --- | --- |
| **Mean** | **(SD)** | **%** | **Median** | **[IQR]** | **Mean** | **(SD)** | **%** | **Median** | **[IQR]** | **Mean** | **(SD)** | **%** | **Median** | **[IQR]** | **Mean** | **(SD)** | **%** | **Median** | **[IQR]** |
| **Pre-diagnosis** | (A) | Medical (pre) | 1.10 | 10.48 | 0.29 | 0.00 | 0.00, 0.00 | 3.94 | 25.45 | 0.62 | 0.00 | 0.00, 0.00 | 0.03 | 0.26 | 0.01 | 0.00 | 0.00, 0.00 | 0.23 | 1.13 | 0.03 | 0.00 | 0.00, 0.00 |
| (B) | Travel (pre) | 4.71 | 5.76 | 1.24 | 2.00 | 1.00, 6.00 | 3.05 | 3.42 | 0.48 | 2.00 | 1.00, 4.00 | 2.77 | 2.11 | 0.46 | 2.00 | 2.00, 4.00 | 4.67 | 7.18 | 0.52 | 2.00 | 1.75, 4.00 |
| (C) | Accommodation (pre) | 0.11 | 1.05 | 0.03 | 0.00 | 0.00, 0.00 | 0.48 | 2.11 | 0.08 | 0.00 | 0.00, 0.00 | 0.36 | 0.85 | 0.06 | 0.00 | 0.00, 0.00 | 0.45 | 1.19 | 0.05 | 0.00 | 0.00, 0.00 |
| (D) | Food (pre) | 1.61 | 5.12 | 0.43 | 0.00 | 0.00, 1.00 | 3.32 | 13.58 | 0.53 | 1.00 | 0.50, 2.00 | 1.40 | 1.48 | 0.23 | 1.00 | 1.00, 1.25 | 2.99 | 5.24 | 0.33 | 1.00 | 0.75, 3.00 |
| (E) | Nutrition (pre) | 0.18 | 0.98 | 0.05 | 0.00 | 0.00, 0.00 | 1.44 | 5.32 | 0.23 | 0.00 | 0.00, 0.00 | 1.81 | 2.54 | 0.30 | 0.00 | 0.00, 4.00 | 1.53 | 2.54 | 0.17 | 0.00 | 0.00, 2.00 |
| **Post-diagnosis** | (F) | Medical (post) | 0.00 | 0.00 | 0.00 | 0.00 | 0.00, 0.00 | 0.31 | 2.30 | 0.05 | 0.00 | 0.00, 0.00 | 0.31 | 2.34 | 0.05 | 0.00 | 0.00, 0.00 | 0.02 | 0.15 | 0.00 | 0.00 | 0.00, 0.00 |
| (G) | Travel (post) | 148.56 | 96.24 | 39.22 | 168.00 | 168.00, 168.00 | 129.30 | 129.15 | 20.47 | 168.00 | 30.90, 168.00 | 106.93 | 101.21 | 17.76 | 100.00 | 24.00, 168.00 | 64.41 | 102.40 | 7.20 | 24.00 | 3.00, 94.00 |
| (H) | Accommodation (post) | 14.91 | 63.27 | 3.94 | 0.00 | 0.00, 0.00 | 36.72 | 112.66 | 5.81 | 0.00 | 0.00, 0.00 | 51.43 | 78.47 | 8.54 | 0.00 | 0.00, 112.00 | 48.43 | 162.92 | 5.41 | 0.00 | 0.00, 0.50 |
| (I) | Food (post) | 241.67 | 313.86 | 63.81 | 168.00 | 168.00, 214.00 | 366.76 | 385.71 | 58.07 | 243.00 | 168.00, 480.00 | 294.58 | 253.00 | 48.92 | 240.00 | 168.00, 336.00 | 403.45 | 428.31 | 45.11 | 288.00 | 160.50, 507.00 |
| (J) | Nutrition (post) | 27.89 | 148.25 | 7.36 | 0.00 | 0.00, 0.00 | 58.67 | 153.42 | 9.29 | 0.00 | 0.00, 5.50 | 127.39 | 138.14 | 21.15 | 120.00 | 0.00, 216.00 | 179.34 | 309.72 | 20.05 | 5.00 | 0.00, 240.00 |
| (K) | Household income loss | -61.98 | 148.46 | -16.36 | 0.00 | -180.00, 0.00 | 27.64 | 328.29 | 4.38 | 0.00 | -180.00, 0.00 | 15.25 | 405.16 | 2.53 | 0.00 | -180.00, 0.00 | 188.94 | 944.63 | 21.12 | 0.00 | -180.00, 0.00 |
| (L) | Hours lost x wage | -87.55 | 90.08 |  | 0.00 | -180.00, 0.00 | -83.19 | 93.19 |  | 0.00 | -180.00, 0.00 | -56.71 | 198.35 |  | 0.00 | -180.00, 0.00 | -39.72 | 230.35 |  | 0.00 | -180.00, 0.00 |
| **Medical** | (A+F) | | 1.10 | 10.48 |  | 0.00 | 0.00, 0.00 | 4.25 | 25.50 |  | 0.00 | 0.00, 0.00 | 0.34 | 2.35 |  | 0.00 | 0.00, 0.00 | 0.26 | 1.13 |  | 0.00 | 0.00, 0.00 |
| **Non-medical** | (B+C+D+E+G+H+I+J) | | 439.64 | 412.59 |  | 342.50 | 336.50, 403.00 | 599.74 | 594.26 |  | 411.25 | 302.25, 650.75 | 586.62 | 447.91 |  | 509.00 | 354.00, 686.00 | 705.27 | 858.76 |  | 494.00 | 229.00, 790.00 |
| **Indirect** | (K) | Output approach | -61.98 | 148.46 |  | 0.00 | -180.00, 0.00 | 27.64 | 328.29 |  | 0.00 | -180.00, 0.00 | 15.25 | 405.16 |  | 0.00 | -180.00, 0.00 | 188.94 | 944.63 |  | 0.00 | -180.00, 0.00 |
| (L) | Human capital approach | -87.55 | 90.08 |  | 0.00 | -180.00, 0.00 | -83.19 | 93.19 |  | 0.00 | -180.00, 0.00 | -56.71 | 198.35 |  | 0.00 | -180.00, 0.00 | -39.72 | 230.35 |  | 0.00 | -180.00, 0.00 |
|  |  |  |  |  |  |  |  |  |  |  |  |  |  |  |  |  |  |  |  |  |  |  |
| **Total** | | Output approach | 378.76 | 445.32 |  | 338.20 | 157.50, 407.90 | 631.63 | 664.16 |  | 430.18 | 210.88, 836.50 | 602.21 | 567.36 |  | 492.00 | 352.00, 646.75 | 894.46 | 1,242.39 |  | 543.25 | 223.46, 1,233.40 |
| Human capital approach | 353.19 | 440.83 |  | 337.00 | 157.00, 391.00 | 520.79 | 610.39 |  | 351.40 | 157.75, 613.85 | 530.25 | 493.53 |  | 490.00 | 341.50, 612.00 | 665.81 | 920.20 |  | 348.50 | 152.75, 891.67 |

IQR: interquartile range; SD: standard deviation.

Note: All costs are expressed in United States dollars. Negative values in indirect cost categories (e.g., household income loss) represent a net financial gain due to the cash transfer intervention.
